# Supplementary material
Source: PubMed Central journal article supplement (PMC6645995)

**Supporting Information**

**Indolyl-Pyridinyl-Propenone-Induced Methuosis  
through the Inhibition of PIKFYVE**

Hyelim Cho,<sup>\*,†,§</sup> Erin Geno,<sup>†,||</sup> Maude Patoor,<sup>†</sup> Adam Reid,<sup>‡</sup> Rick McDonald,<sup>†</sup>  
Marc Hild,<sup>\*,†</sup> and Jeremy L. Jenkins<sup>\*,†</sup>

<sup>†</sup>Chemical Biology and Therapeutics, Novartis Institutes for BioMedical Research, 181  
Massachusetts Avenue, Cambridge, Massachusetts 02139, USA

<sup>‡</sup>Department of Chemistry, Johns Hopkins University, 3400 N. Charles Street, Baltimore,  
Maryland 21218, USA

**Figure S1. Synthetic Protocols**

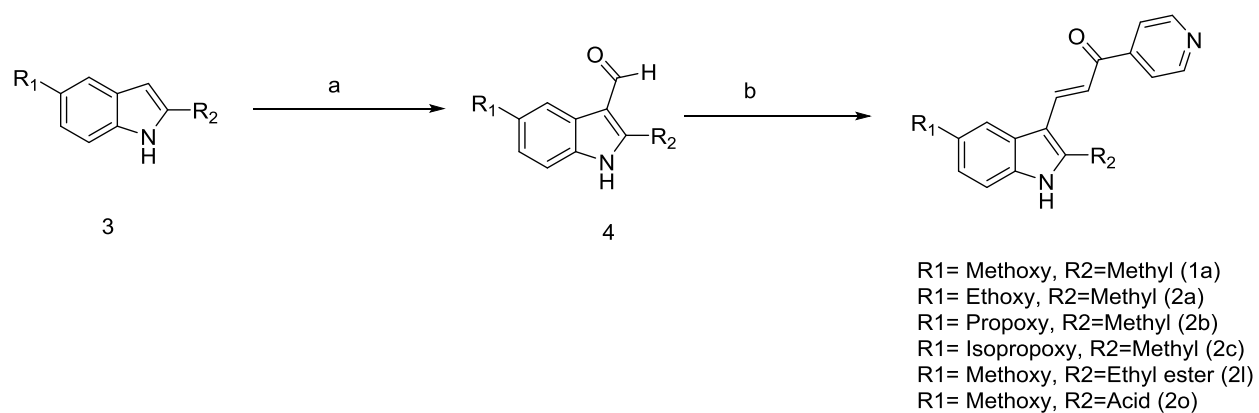

Reagents and conditions: (a) POCl<sub>3</sub>, DMF; (b) 4-acetylpyridine; pyrrolidine (1a), piperidine (2a, 2b, 2c, 2l), reflux

Figure S2.  $^1\text{H}$  NMR spectra

$^1\text{H}$  NMR (400 MHz, DMSO-d<sub>6</sub>) of **1a**

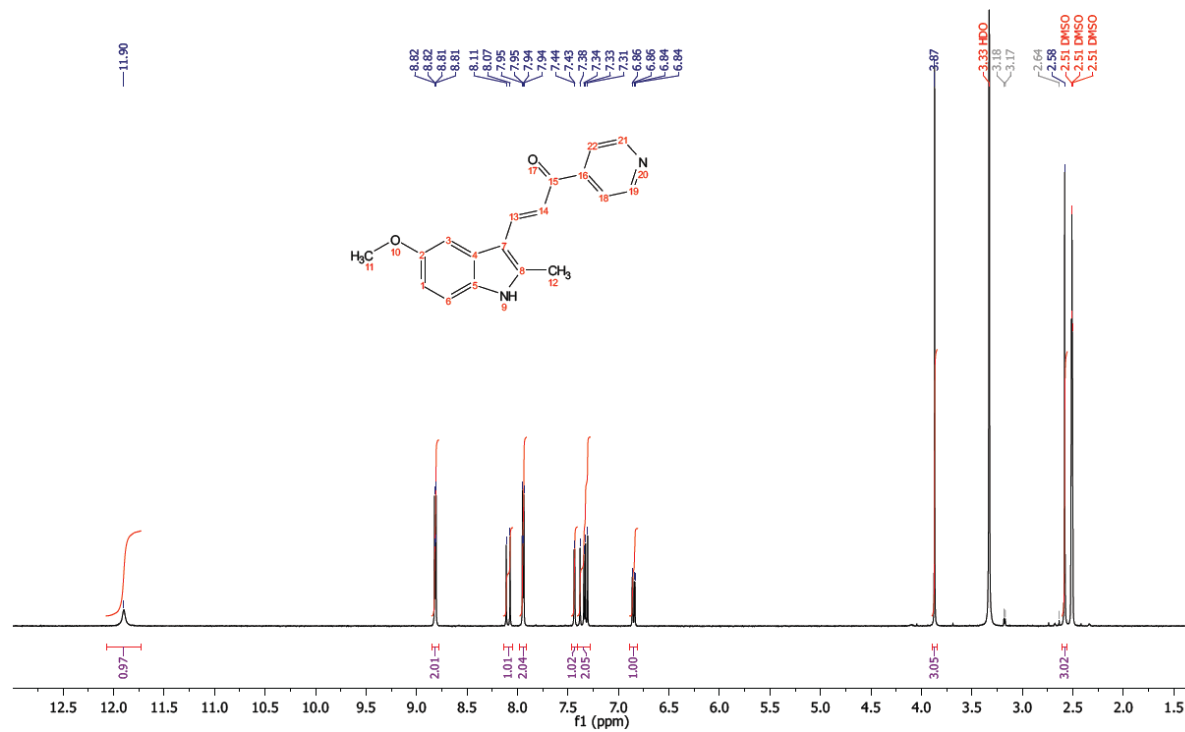

<sup>1</sup>H NMR (400 MHz, DMSO-d6) of 2a

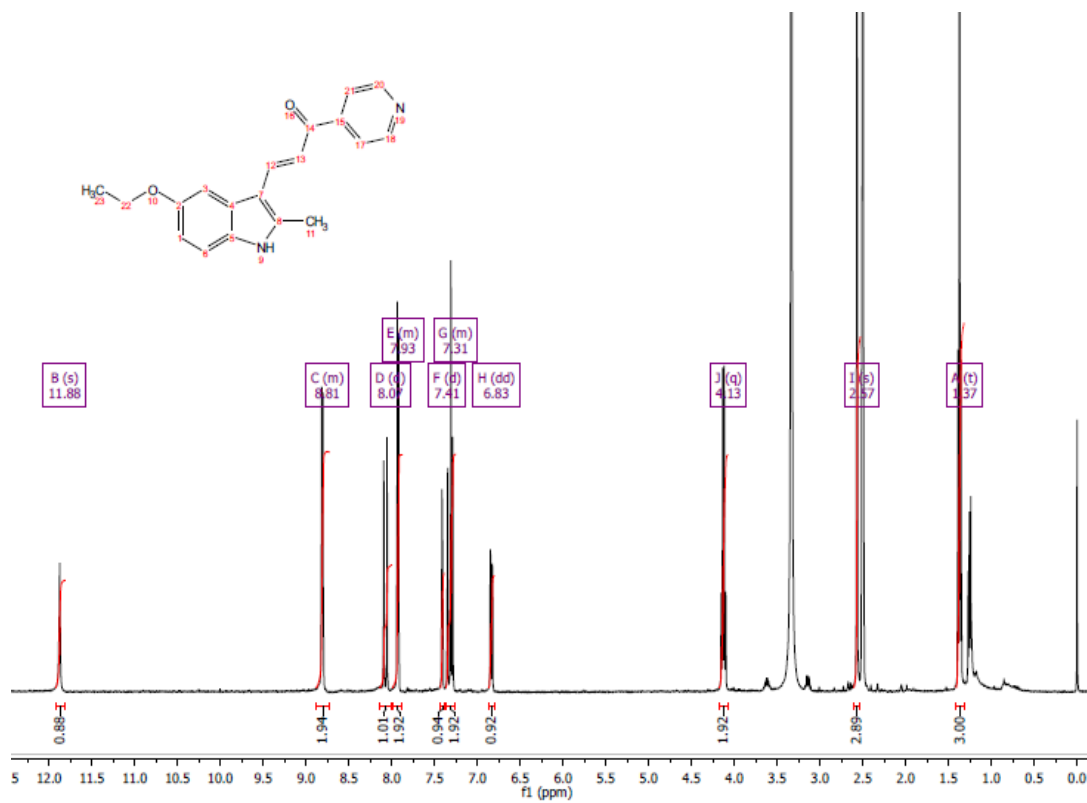

$^1\text{H}$  NMR (400 MHz, DMSO-d<sub>6</sub>) of **2b**

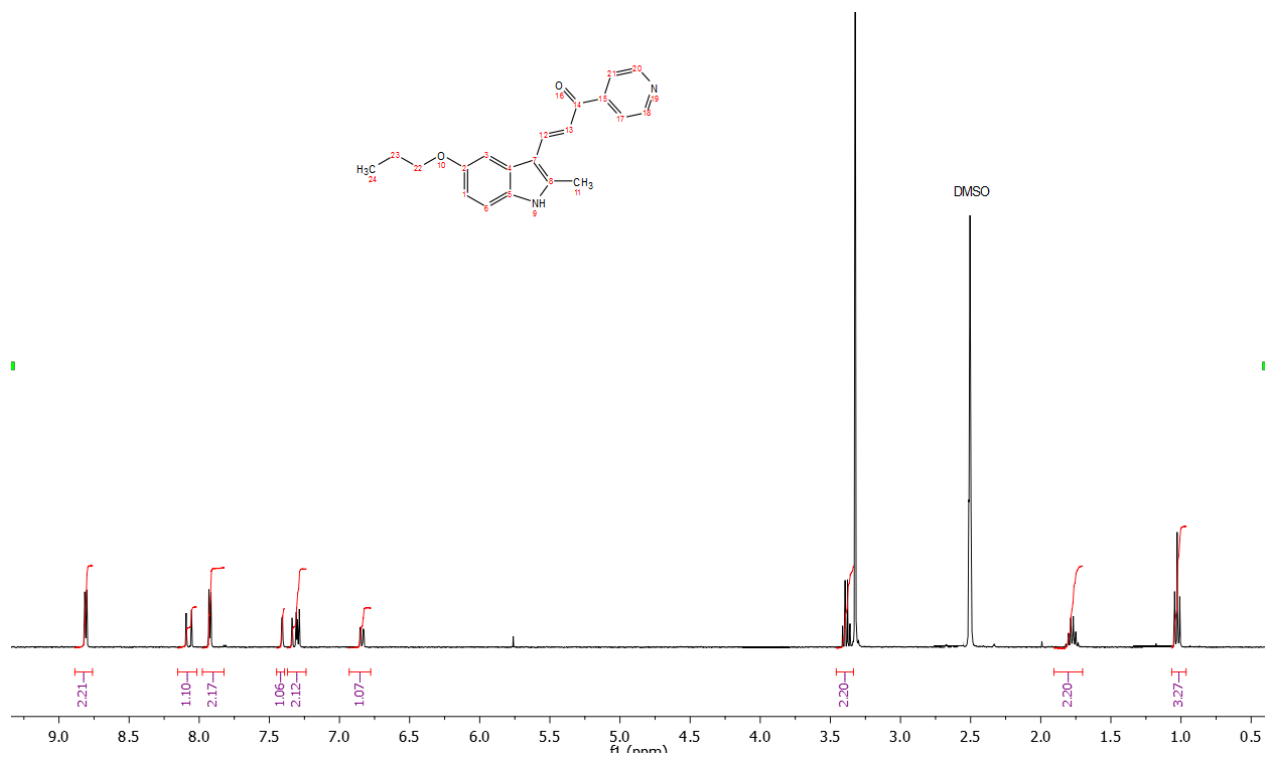

$^1\text{H}$  NMR (400 MHz, DMSO d<sub>6</sub>) of **2c**

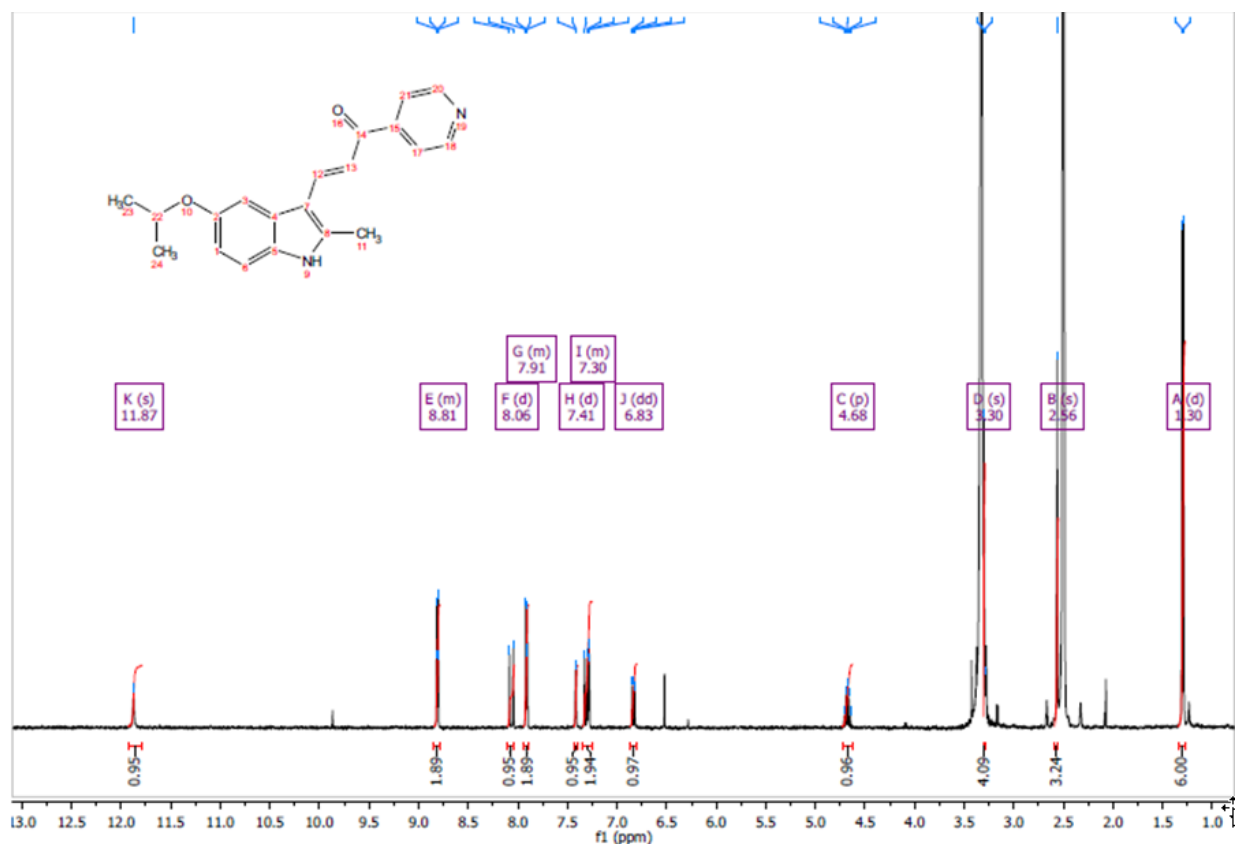

<sup>1</sup>H NMR (400 MHz, DMSO-d<sub>6</sub>) of **2l**

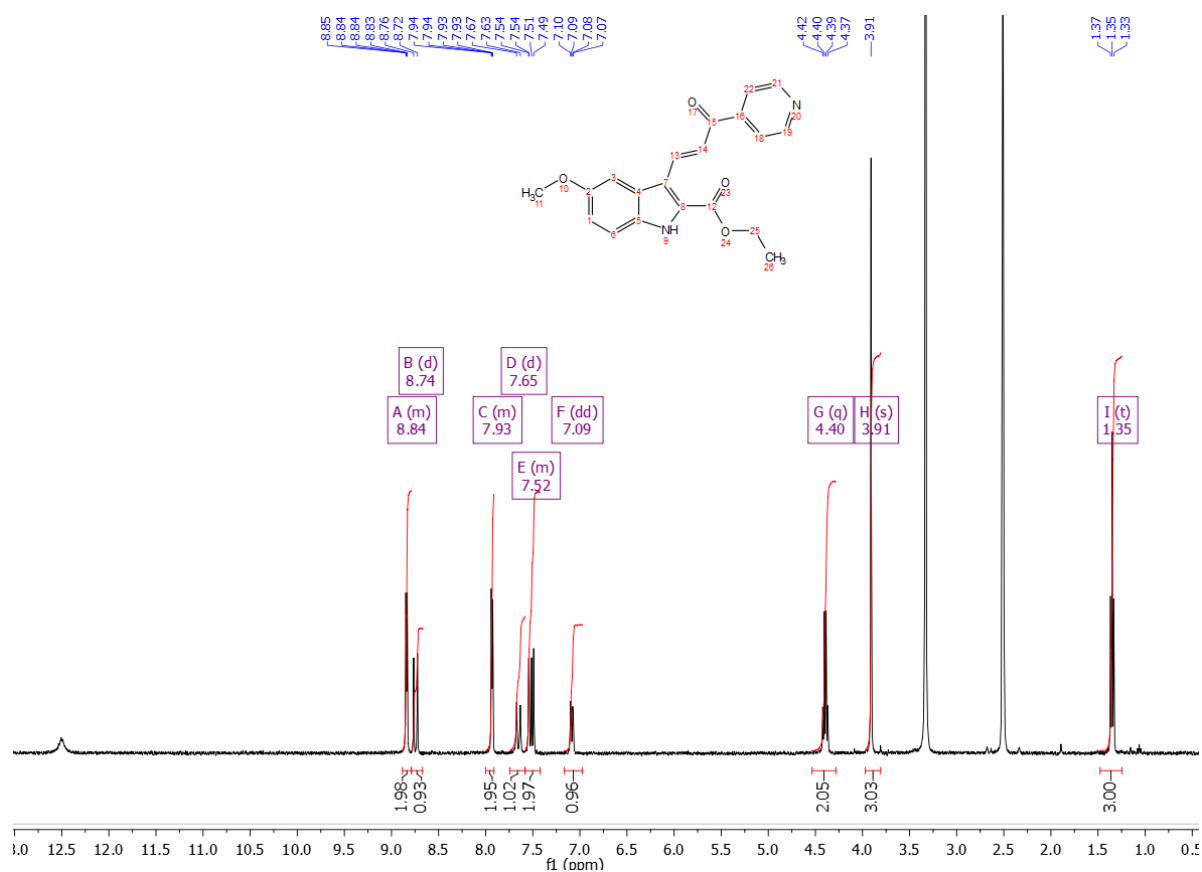

<sup>1</sup>H NMR (400 MHz, DMSO-d<sub>6</sub>) of **2o**

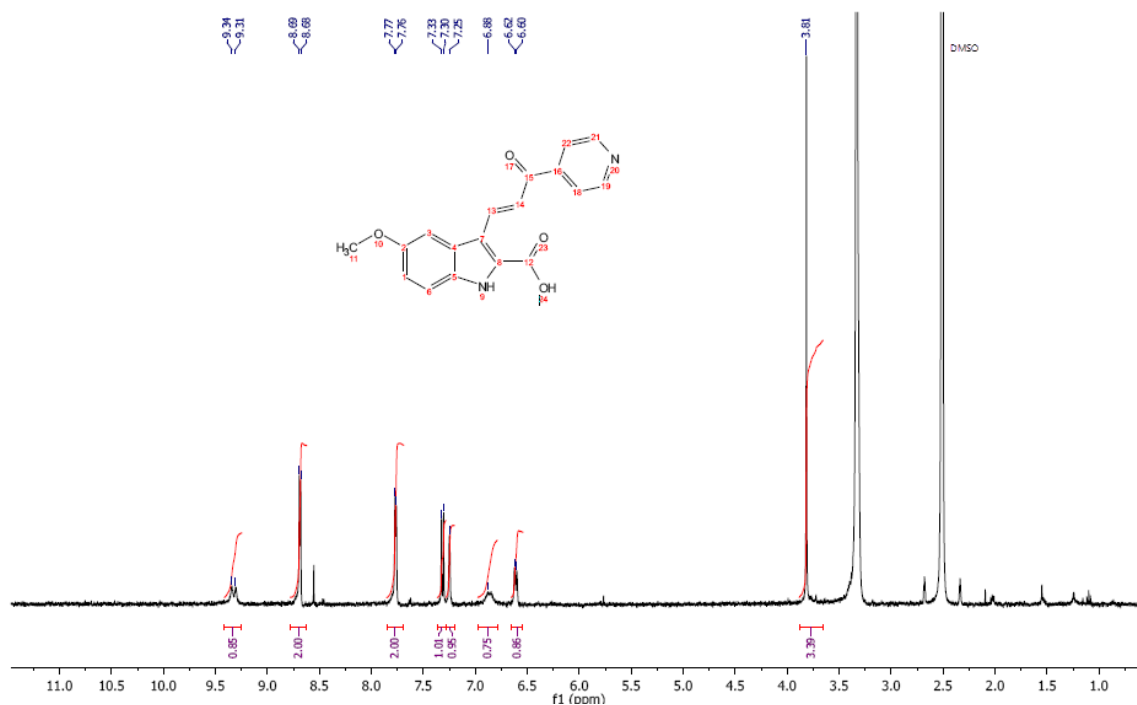

Figure S3. HPLC spectra

HPLC of 1a

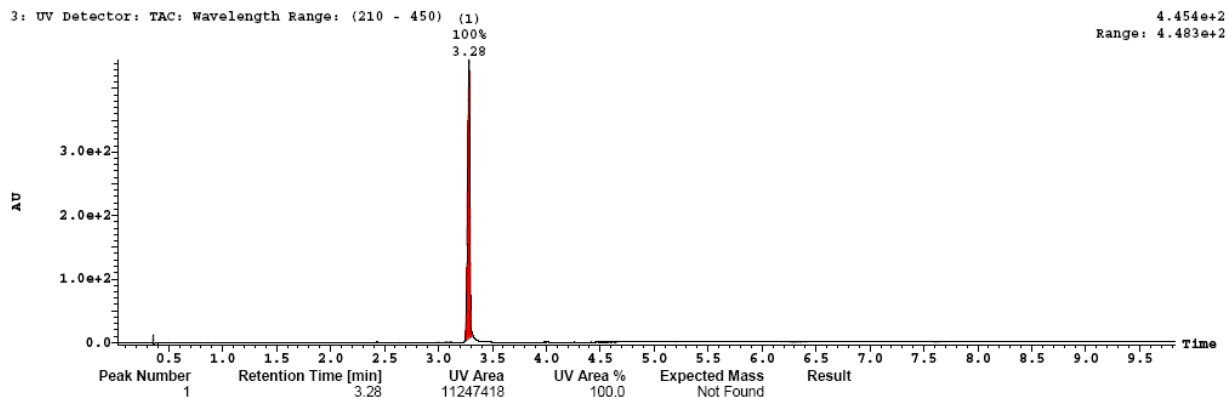

HPLC of 2a

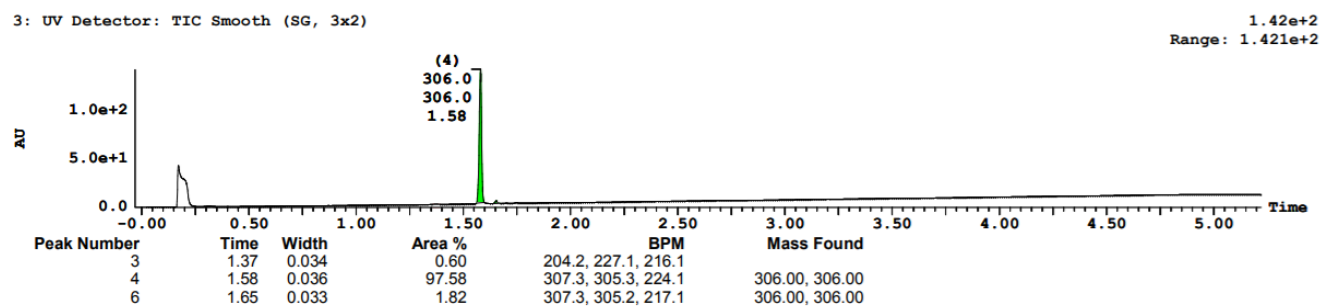

HPLC of 2b

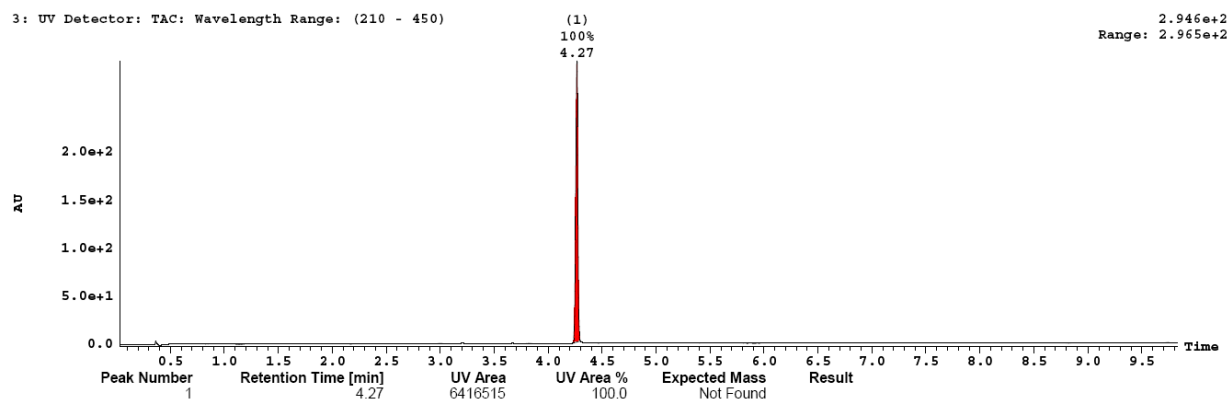

### HPLC of 2c

3: UV Detector: TIC Smooth (SG, 3x2)

8.462e+1  
Range: 8.472e+1

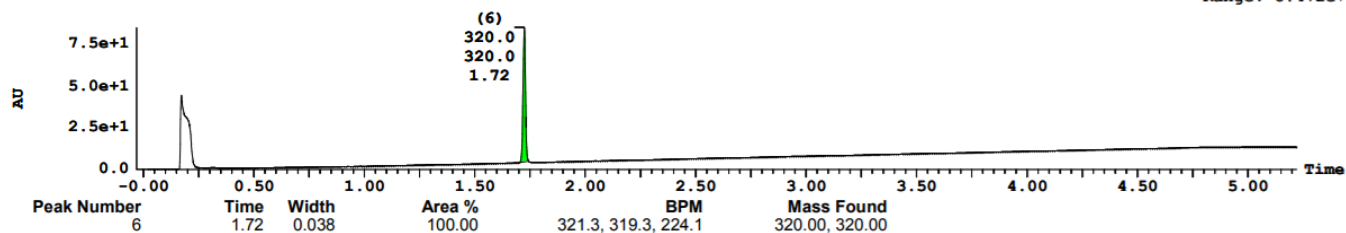

### HPLC of 2l

3: UV Detector: TAC: Wavelength Range: (210 - 450)

5.065e+1  
Range: 5.278e+1

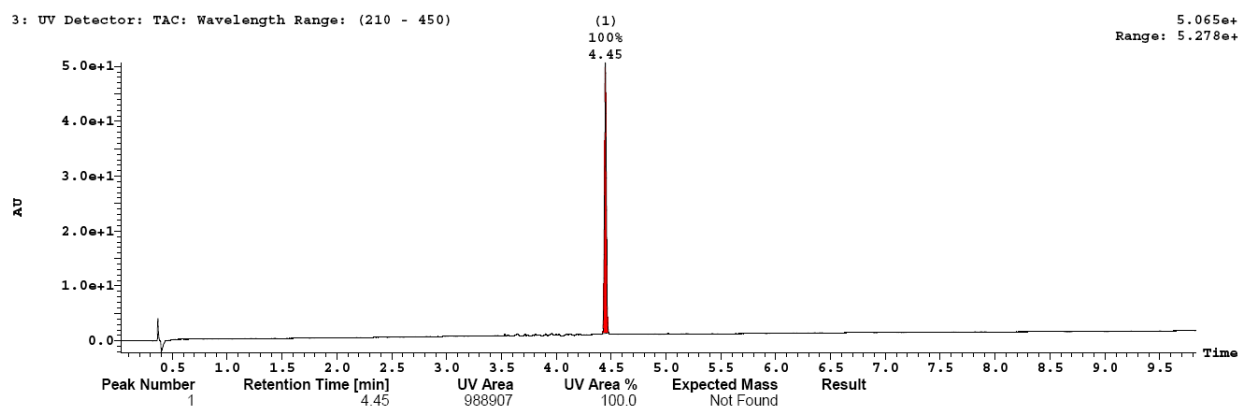

### HPLC of 2o

3: UV Detector: TAC: Wavelength Range: (210 - 450)

2.657e+2  
Range: 2.673e+2

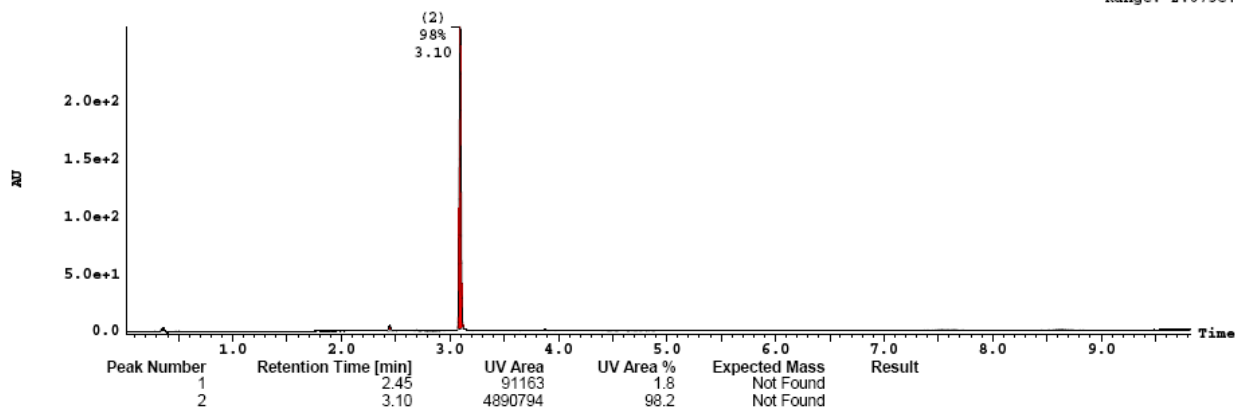



Figure S4. HR-MS spectra

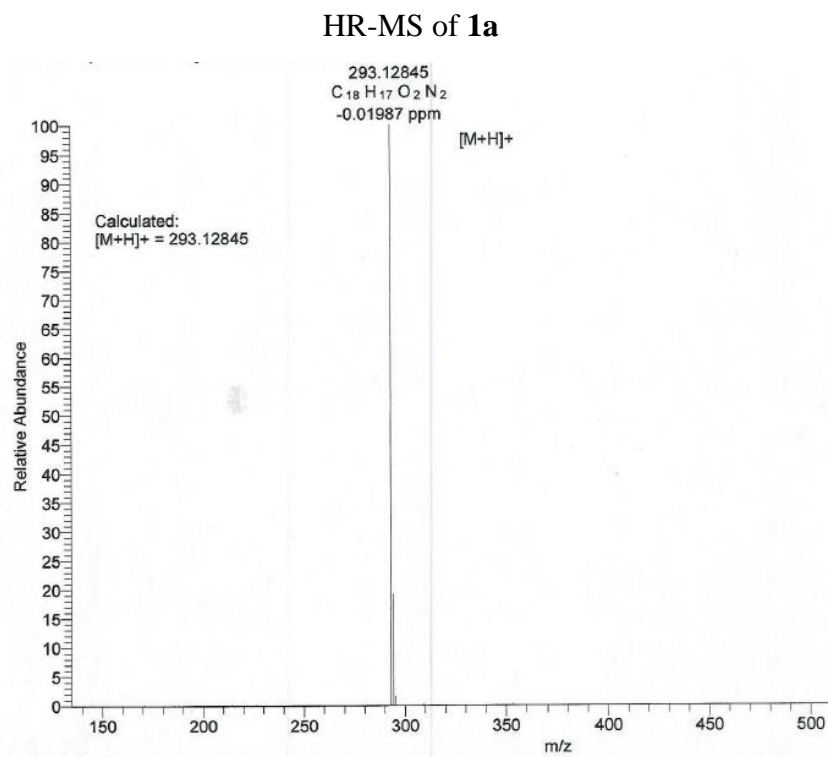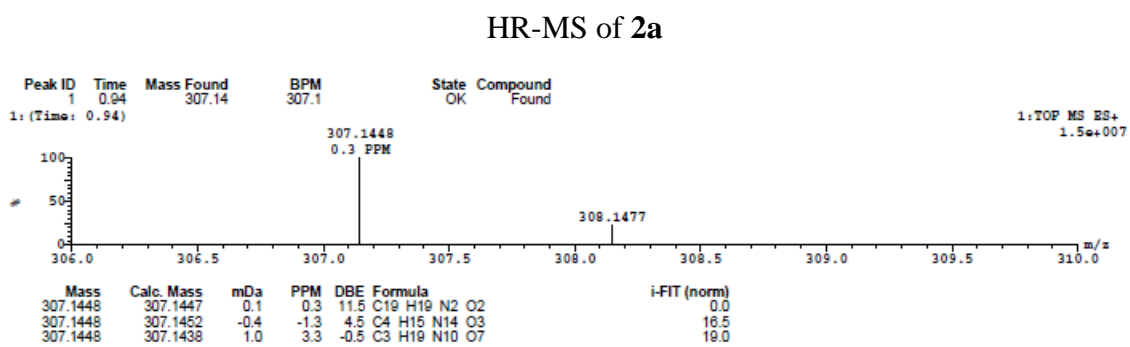

### HR-MS of 2b

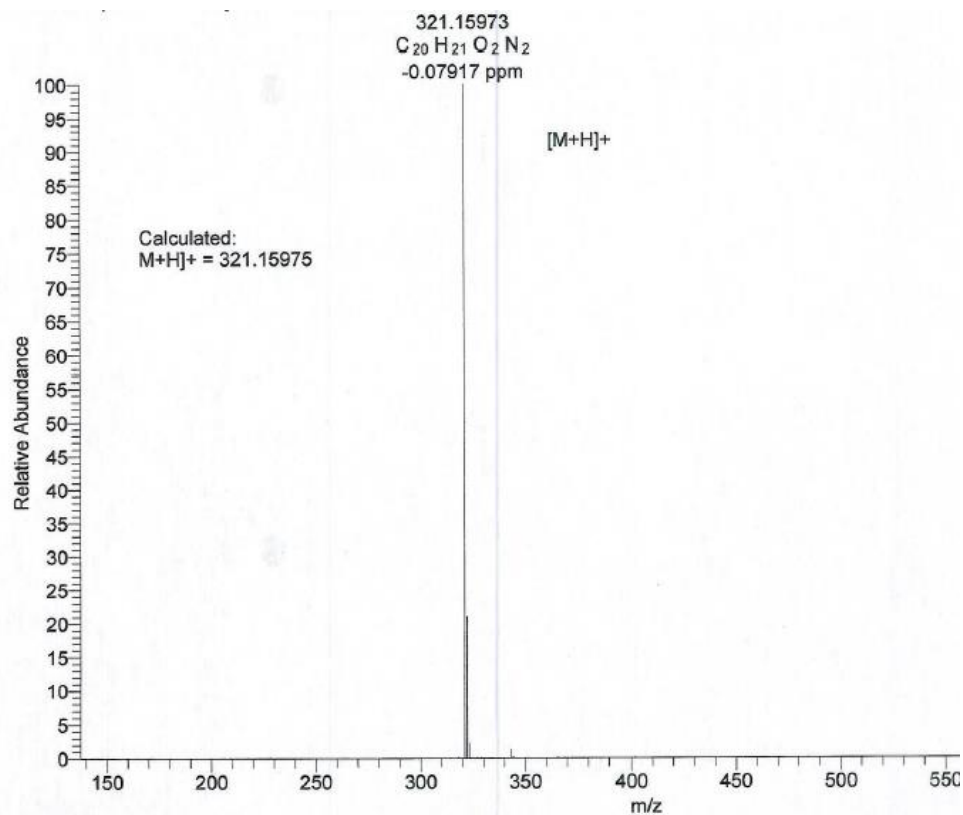

### HRMS of 2c

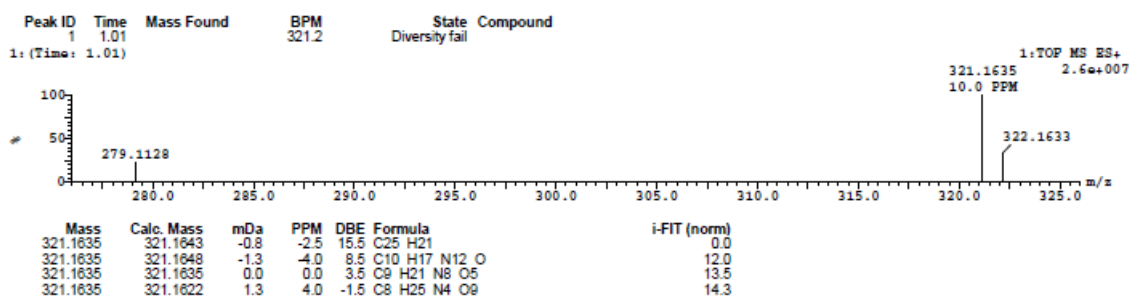

### HR-MS of 2l

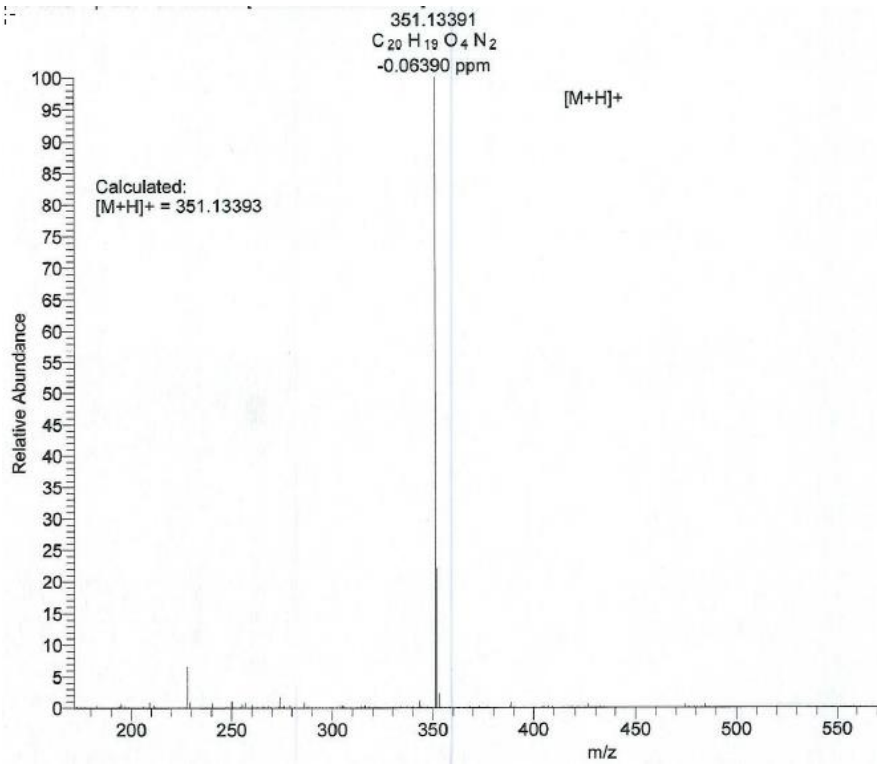

### HR-MS of 2o

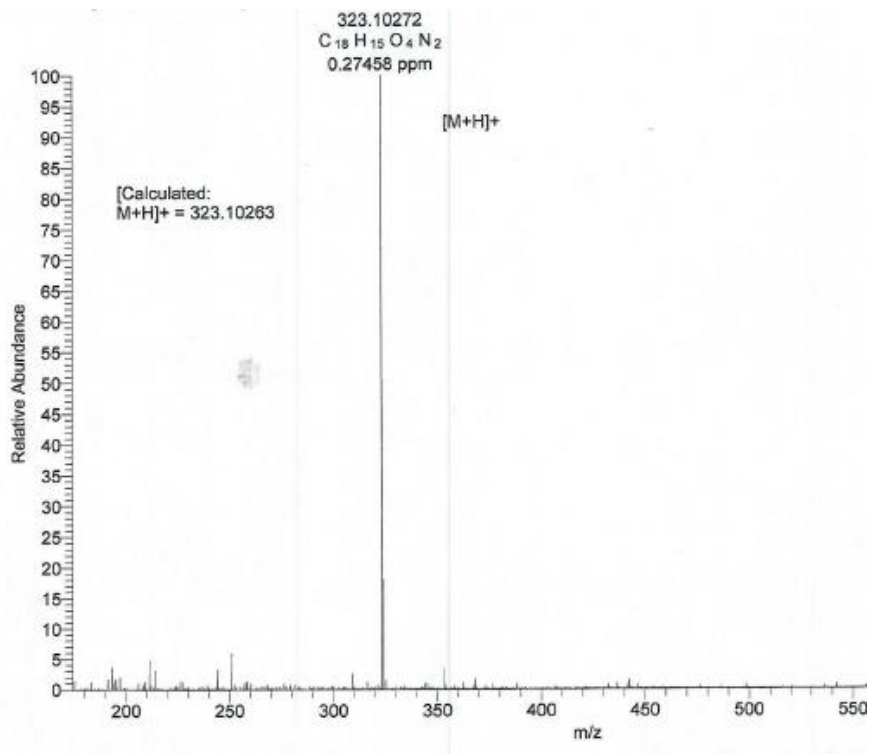

Supplement: ao8b00202_si_001.pdf [file ao8b00202_si_001.pdf]
